# Supplementary material
Source: PubMed Central journal article supplement (PMC6597506)
Supplement: rsbl20190180supp1.pdf [file rsbl20190180supp1.pdf]

## Supplementary material

### Can pathogens optimize both transmission and dispersal by exploiting sexual dimorphism in their hosts?

Louise Solveig Nørgaard<sup>1\*</sup>, Ben L. Phillips<sup>2</sup> & Matthew D. Hall<sup>1</sup>

<sup>1</sup>School of Biological Sciences, Centre for Geometric Biology, Monash University,  
Melbourne 3800, Australia

<sup>2</sup>Department of Biosciences, University of Melbourne, Parkville, VIC, Australia

\*Corresponding author: [louise.noergaard@monash.edu](mailto:louise.noergaard@monash.edu)

## Production of male and female *Daphnia*

Naturally, female *Daphnia* can shift to producing male and female offspring given certain environmental conditions (Ebert 2005). However, in the laboratory, we can induce the production of males and females by exposing mothers to a small amount of juvenoid hormone, methyl farnesoate (Echelon Biosciences, product number S-0153). Specifically, experimental mothers were prepared by collecting juvenile female *Daphnia magna* from stock cultures and cultured individually in 60 mL jars filled with 50 mL artificial *Daphnia* medium (ADaM, Klüttgen et al. 1994; modified by Ebert et al. 1998) for three generations, to minimize maternal effects. *Daphnia* were transferred into fresh ADaM twice a week, maintained under standard conditions (20°C, 16L: 8D) and fed up to 5 million *Scenedesmus* algal cells daily; steadily increased to accommodate growing needs of the animal. Trays were rearranged every three days to minimise any positional effects.

To produce experimental male and females, the experimental mother generation were exposed to 300 µg L<sup>-1</sup> methyl farnesoate hormone, after producing their first clutch, and then transferred into fresh hormone-treated media every 2 days. Subsequent clutches were collected, and the sex of all offspring determined and used as experimental animals. *Daphnia* sex were determined by the presence of a “modified first leg” as per Ebert 2005, since sexual dimorphism in body size is minimal in juveniles (Ebert 2005). Finally, this method can be used to reliably produce male and female *Daphnia* while having no detectable impact on lifespan, fecundity, infection rates or spore loads (Thompson et al. 2017).

## Manipulation of host density signals

In a variety of zooplankton, including *Daphnia magna*, info-chemicals and metabolic waste released from conspecifics, influence life-history investment in a variety of traits. Furthermore, presence of info-chemicals as a cue of stress, has been used in a variety of studies, exposing individuals to “stress conditioned water” (Folt & Goldman 1981; Goser & Ratte 1994; Burns 2000; Lüring *et al.* 2003; Michel *et al.* 2016). In this experiment, we exploit release of info-chemicals to simulate cues related to high density in a two-patch experimental microcosm system. Conditioned water was produced by incubating healthy *Daphnia* in 500 mL glass jars (~250 adult *Daphnia* L<sup>-1</sup>). After 5 days of incubation, we collected the conditioned water by using a coarse-meshed plankton net (mesh size 0.1 mm) to remove *Daphnia*, and then pumping the conditioned water through a 0.45 µm filter to remove debris and algae cells, following (Michel *et al.* 2016).

Table S1 Probability of dispersal from a crowded habitat to an empty neighbouring habitat. Results show the analysis of variance from a generalized linear model using infection status (yes or no), host sex (male or female), and their interaction as fixed effects.

| <b>Source</b>          | <b><math>\chi^2</math></b> | <b>d.f.</b> | <b>P-value</b> | <b>Sign. code</b> |
|------------------------|----------------------------|-------------|----------------|-------------------|
| Sex                    | 68.621                     | 1           | <0.001         | ***               |
| Infection status       | 28.802                     | 1           | <0.001         | ***               |
| Sex x Infection status | 16.219                     | 1           | <0.001         | ***               |

Table S2 ANCOVA results from a fitted linear mixed effect model using accumulated number of patches as a continuous response variable and time (in days) as a covariate, and host sex, infection treatment (uninfected control, pathogen C19 and C1) and their interaction, as fixed effects, and individual id as random effect.

| <b>Source</b>             | $\chi^2$  | <b>d.f.</b> | <b>P-value</b> | <b>Sign. code</b> |
|---------------------------|-----------|-------------|----------------|-------------------|
| Sex                       | 0.285     | 1           | 0.594          |                   |
| Infection treatment (Trt) | 4.437     | 2           | 0.109          |                   |
| Day number                | 13251.183 | 1           | <0.001         | ***               |
| Day number x Sex          | 2507.064  | 1           | <0.001         | ***               |
| Day number x Trt          | 1464.637  | 2           | <0.001         | ***               |
| Sex x Trt                 | 9.724     | 2           | 0.008          | **                |
| Day number x Sex x Trt    | 666.494   | 2           | <0.001         | ***               |

Table S3 ANOVA results for model predicting square root transformed total number of patches travelled, using host sex and infection treatment (uninfected control, pathogen C19, and C1) as fixed effects.

| <b>Source</b>             | <b>d.f.</b> | <b>F</b> | <b>P-value</b> | <b>Sign. code</b> |
|---------------------------|-------------|----------|----------------|-------------------|
| Sex                       | 1,93        | 37.820   | <0.001         | ***               |
| Infection treatment (Trt) | 2,93        | 70.349   | <0.001         | ***               |
| Sex x Trt                 | 2,93        | 13.489   | <0.001         | ***               |

Table S4 ANOVA results of two factor analysis of variance with square transformed pathogen spore load as response and using host sex and pathogen genotype (Gp, pathogen C1 or C19) as fixed effects.

| <b>Source</b>          | <b>d.f.</b> | <b>F</b> | <b>P-value</b> | <b>Sign. code</b> |
|------------------------|-------------|----------|----------------|-------------------|
| Sex                    | 1, 64       | 106.717  | <0.001         | ***               |
| Pathogen genotype (Gp) | 1, 64       | 13.923   | <0.001         | ***               |
| Gp x Sex               | 1, 64       | 1.425    | 0.237          |                   |

## Size corrected spore load in male and female hosts

When accounting for standard body sizes obtained from the literature (male = 2 mm and female = 5 mm, Benzie, J. A. H., 2005), we find evidence that pathogens were able to produce more transmission spores in female hosts, compared to male hosts. This suggest that the pathogens are better at utilising female resources, or, that females provide a higher quality resource patch, for pathogen proliferation.

Table S5 ANOVA results of two factor analysis of variance using relative pathogen spore production in male and female hosts, corrected for standard body sizes. Relative spore load is predicted using host sex, pathogen genotype (C1 and C19) and their interaction as fixed effects.

| <b>Source</b>           | <b>d.f.</b> | <b>F-value</b> | <b>P-value</b> | <b>Sign. code</b> |
|-------------------------|-------------|----------------|----------------|-------------------|
| Sex                     | 1,64        | 23.0245        | <0.001         | ***               |
| Pathogen genotype       | 1,64        | 22.182         | <0.001         | ***               |
| Sex x Pathogen genotype | 1,64        | 1.417          | 0.238          |                   |



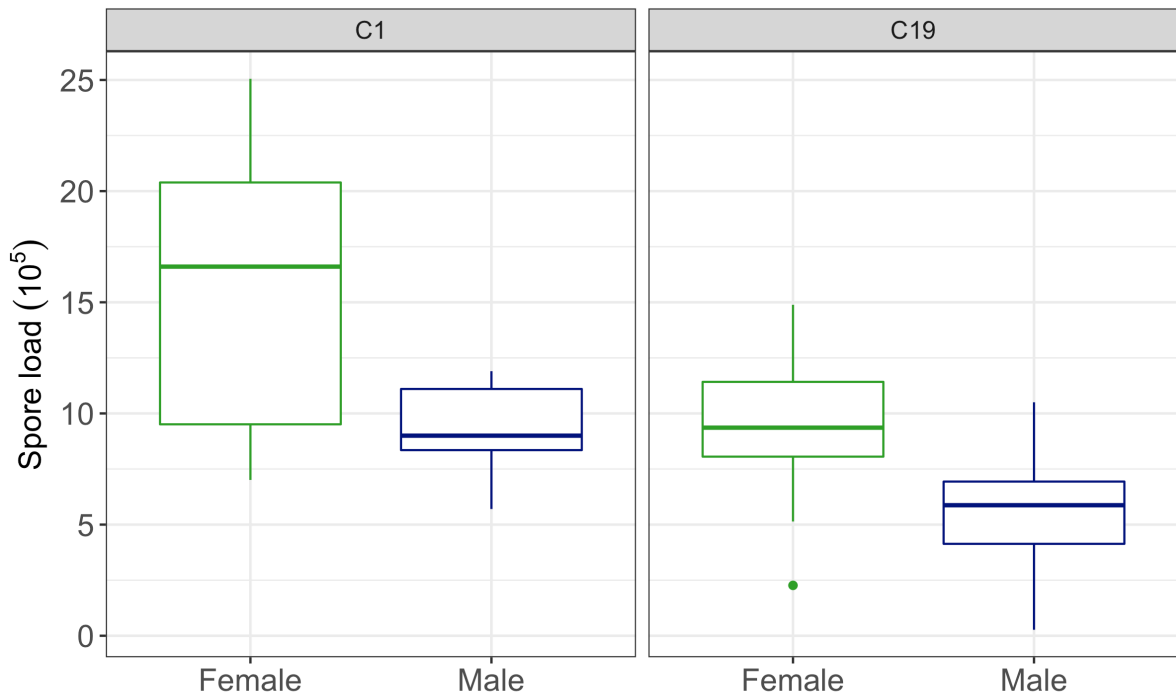

Figure S1 Relative pathogen spore production corrected by standard body size (left: pathogen C1, right: pathogen C19) of males (blue) and females (green).

## Cited literature in supplementary material

- Benzie, J. A. H. (2005). Cladocera: the genus of *Daphnia* (including *Daphniopsis*) (anomopoda *Daphniidae*). Guides to the identification of the microinvertebrates of the continental waters of the world. *The Quarterly Review of Biology.*, 80(4). (doi: 10.1086/501297)
- Burns, C.W. (2000). Crowding-induced changes in growth, reproduction and morphology of *Daphnia*. *Freshw. Biol.*, 43, 19–29. (doi: <https://doi.org/10.1046/j.1365-2427.2000.00510.x>)
- Ebert, D. (2005). *Ecology, Epidemiology and Evolution of Parasitism in Daphnia*. *Natl. Libr. Med. (US), Natl. Cent. Biotechnol.*
- Ebert, D., Zschokke-Rohringer, C.D. & Carius, H.J. (1998). Within–and between–population variation for resistance of *Daphnia magna* to the bacterial endoparasite *Pasteuria ramosa*. *Proc. R. Soc. London. Ser. B Biol. Sci.*, 265, 2127–2134. (doi: 10.1098/rspb.1998.0549)
- Folt, C. & Goldman, C.R. (1981). Allelopathy between Zooplankton : A Mechanism for Interference Competition. *Sci. New Ser.*, 213, 1133–1135.
- Goser, B. & Ratte, H.T. (1994). Experimental evidence of negative interference in *Daphnia magna*. *Oecologia*, 98, 354–361.
- Kluttgen, B., Dulmer, U., Engels, M., Ratte, H., Klüttgen, B., Dülmer, U., *et al.* (1994). ADaM, an artificial freshwater for the culture of zooplankton. *Water Res.*, 28, 743–746.
- Lürling, M., Roozen, F., Van Donk, E. & Goser, B. (2003). Response of *Daphnia* to substances released from crowded congeners and conspecifics. *J. Plankton Res.*, 25, 967–978. (doi: 10.1093/plankt/25.8.967)

Michel, J., Ebert, D. & Hall, M.D. (2016). The trans-generational impact of population density on host-parasite interactions. *BMC Evol. Biol.*, 16, 1–12. (doi: 10.1186/s12862-016-0828-4)
